# Supplementary material
Source: publisher site journal article supplement (http://www.kjim.org/upload/media/kjim-2021-214-suppl3.pdf)
Supplement: Supplementary file 1 [file kjim-2021-214-suppl3.pdf]

**Supplementary Table 1. Baseline characteristics of the four SHS exposure groups in men**

| Characteristic                     | No SHS exposure<br>(n = 18,052) | New SHS exposure<br>(n = 1,414) | Former SHS exposure<br>(n = 5,554) | Sustained SHS exposure<br>(n = 2,184) | p value |
|------------------------------------|---------------------------------|---------------------------------|------------------------------------|---------------------------------------|---------|
| Age, yr                            | 35.8 ± 5.7 <sup>b,c</sup>       | 35.4 ± 5.8                      | 35.3 ± 5.6 <sup>b</sup>            | 35.1 ± 5.7 <sup>c</sup>               | < 0.001 |
| Body mass index, kg/m <sup>2</sup> | 23.9 ± 2.8 <sup>a,b,c</sup>     | 24.2 ± 2.8 <sup>a</sup>         | 24.1 ± 2.9 <sup>b,f</sup>          | 24.3 ± 2.9 <sup>c,f</sup>             | < 0.001 |
| Waist circumference, cm            | 84.5 ± 7.7 <sup>a,c</sup>       | 85.5 ± 7.5 <sup>a</sup>         | 84.9 ± 7.6                         | 85.5 ± 7.7 <sup>†</sup>               | < 0.001 |
| Systolic blood pressure, mmHg      | 111.8 ± 9.7 <sup>b,c</sup>      | 112.2 ± 9.5                     | 112.7 ± 9.6 <sup>b</sup>           | 112.7 ± 9.6 <sup>c</sup>              | < 0.001 |
| Diastolic blood pressure, mmHg     | 71.5 ± 7.7 <sup>b</sup>         | 71.6 ± 7.5                      | 71.8 ± 7.7 <sup>b</sup>            | 71.7 ± 7.8                            | 0.020   |
| Total cholesterol, mmol/L          | 5.07 ± 0.84                     | 5.08 ± 0.82                     | 5.08 ± 0.86                        | 5.10 ± 0.86                           | 0.258   |
| Triglycerides, mmol/L              | 1.11 (0.81–1.57)                | 1.13 (0.84–1.63)                | 1.11 (0.80–1.57)                   | 1.12 (0.81–1.61)                      | 0.051   |
| LDL-C, mmol/L                      | 3.25 ± 0.78                     | 3.27 ± 0.76                     | 3.25 ± 0.79                        | 3.28 ± 0.80                           | 0.369   |
| HDL-C, mmol/L                      | 1.39 ± 0.32                     | 1.37 ± 0.31 <sup>d</sup>        | 1.40 ± 0.32 <sup>d</sup>           | 1.39 ± 0.32                           | 0.010   |
| Glucose, mmol/L                    | 5.25 ± 0.60                     | 5.23 ± 0.58                     | 5.27 ± 0.65                        | 5.28 ± 0.66                           | 0.063   |
| HemoglobinA <sub>1c</sub> , %      | 5.56 ± 0.36                     | 5.56 ± 0.39                     | 5.56 ± 0.37                        | 5.56 ± 0.40                           | 0.961   |
| Creatinine, μmol/L                 | 88.2 ± 10.4 <sup>b</sup>        | 87.7 ± 10.0 <sup>d</sup>        | 88.8 ± 10.7 <sup>b,d,f</sup>       | 87.9 ± 10.3 <sup>f</sup>              | < 0.001 |
| Uric acid, μmol/L                  | 363.7 ± 70.1                    | 367.5 ± 69.9                    | 366.5 ± 72.4                       | 367.6 ± 72.7                          | 0.005   |
| hsCRP, mg/L                        | 0.5 (0.3–0.9)                   | 0.5 (0.3–1.0)                   | 0.5 (0.3–0.9)                      | 0.5 (0.3–1.0)                         | 0.006   |
| Alcohol consumption, g/day         | 6 (3–13) <sup>a,b,c</sup>       | 7 (3–14) <sup>a,d,e</sup>       | 9 (4–19) <sup>b,d,f</sup>          | 10 (4–25) <sup>c,e,f</sup>            | < 0.001 |
| Vigorous exercise (≥ 5 times/week) | 519/17,842 (2.9)                | 34/1,400 (2.4)                  | 176/5,509 (3.2)                    | 55/2,168 (2.5)                        | 0.285   |
| Diabetes mellitus                  | 313/18,049 (1.7)                | 19/1,414 (1.3)                  | 92/5,552 (1.7)                     | 37/2,184 (1.7)                        | 0.738   |

Values are presented as mean ± standard deviation, number (%), or median (interquartile). Triglyceride, hsCRP, and alcohol consumption were log-transformed for this analysis. *p* values were based on one-way analysis of variance (ANOVA) or chi-square test.

SHS, secondhand smoke; LDL-C, low density lipoprotein cholesterol; HDL-C, high density lipoprotein cholesterol; hsCRP, high-sensitivity C-reactive protein.

Statistically significant (*p* < 0.05) by Scheffe's multiple comparison: <sup>a</sup>no SHS exposure vs. new SHS exposure.

<sup>b</sup>No SHS exposure vs. former SHS exposure.

<sup>c</sup>No SHS exposure vs. sustained SHS exposure.

<sup>d</sup>New SHS exposure vs. former SHS exposure.

<sup>e</sup>New SHS exposure vs. sustained SHS exposure.

<sup>f</sup>Former SHS exposure vs. sustained SHS exposure.
